# Supplementary material for: Decoding multicomponent hydrochemical anomalies: A synergy anomaly detection model for earthquake forecasting in active tectonic zone
Source: Copernicus journal article supplement (doi:10.5194/egusphere-2025-2132), 2025-07-17
Supplement: Supplementary file 1 [file Supplementary Material.pdf › Supplementary Material.pdf]

# Decoding multicomponent hydrochemical anomalies: A synergy anomaly detection model for earthquake forecasting in active tectonic zone

Weiye Shao<sup>1</sup>, Ying Li<sup>2,\*</sup>, Xiaocheng Zhou<sup>2,\*</sup>, Zhi Chen<sup>2</sup>, Huajiao Liu<sup>3</sup>, Zhao-fei Liu<sup>2</sup>, Chang Lu<sup>2</sup>, Yuwen Wang<sup>2,4</sup>, Zhaojun Zeng<sup>2,4</sup>, Yun Wang<sup>5</sup>, Hongyi He<sup>6,2</sup>, Shaohui Fan<sup>1</sup>

<sup>1</sup>Yunnan Earthquake Agency, Kunming 650224, China

<sup>2</sup>United Laboratory of High-Pressure Physics and Earthquake Science, Institute of Earthquake Forecasting, Beijing 100036, China

<sup>3</sup>Sichuan Earthquake Agency, Chengdu 610041, China

<sup>4</sup>School of the Earth Sciences and Resources, China University of Geosciences, Beijing 100083, China

<sup>5</sup>Department of Insurance, School of Finance, Yunnan University of Finance and Economics, Kunming 650221, China

<sup>6</sup>Key Laboratory of Shale Gas Exploration, Ministry of Natural Resources, China University of Petroleum, Beijing 102249, China

\*Correspondence to: Ying Li (living@ief.ac.cn), Xiaocheng Zhou (zhouxiaocheng188@163.com).

## Contents of this file

Figure S1

Figure S2

Figure S3

Figure S4

Table S1

Table S2

25 **Supplementary Information for Figure**

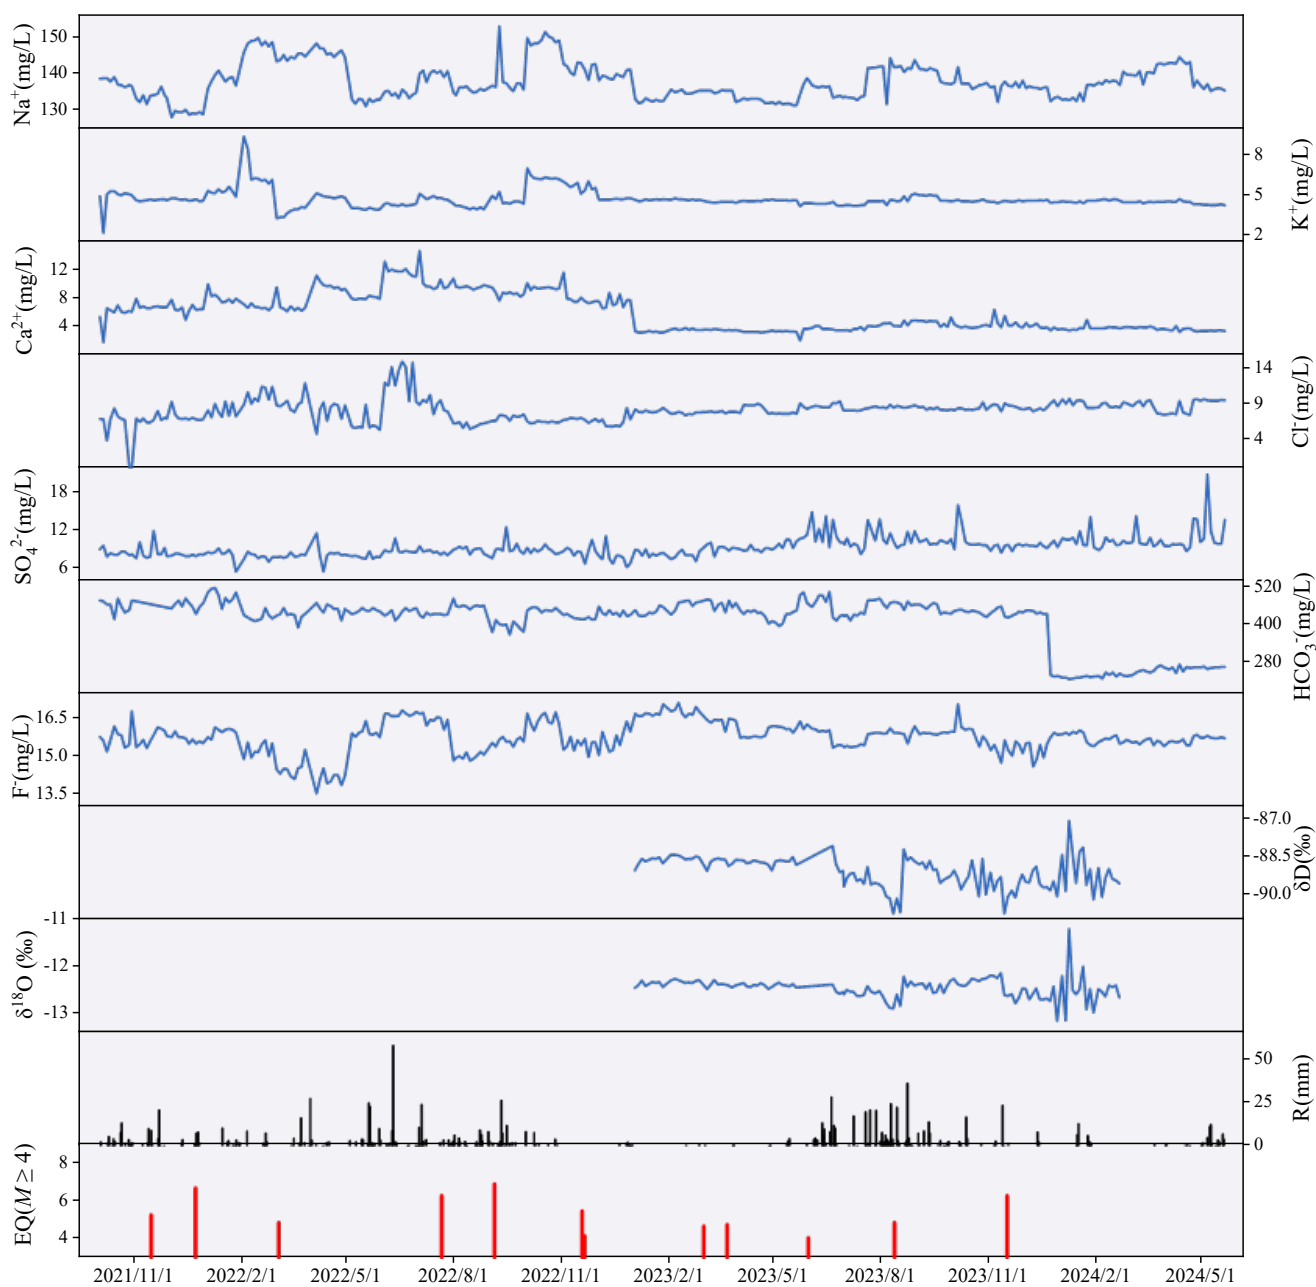

26  
27 **Figure S1.** Time series of hydrochemical components of Wana spring, rainfall and earthquake events.

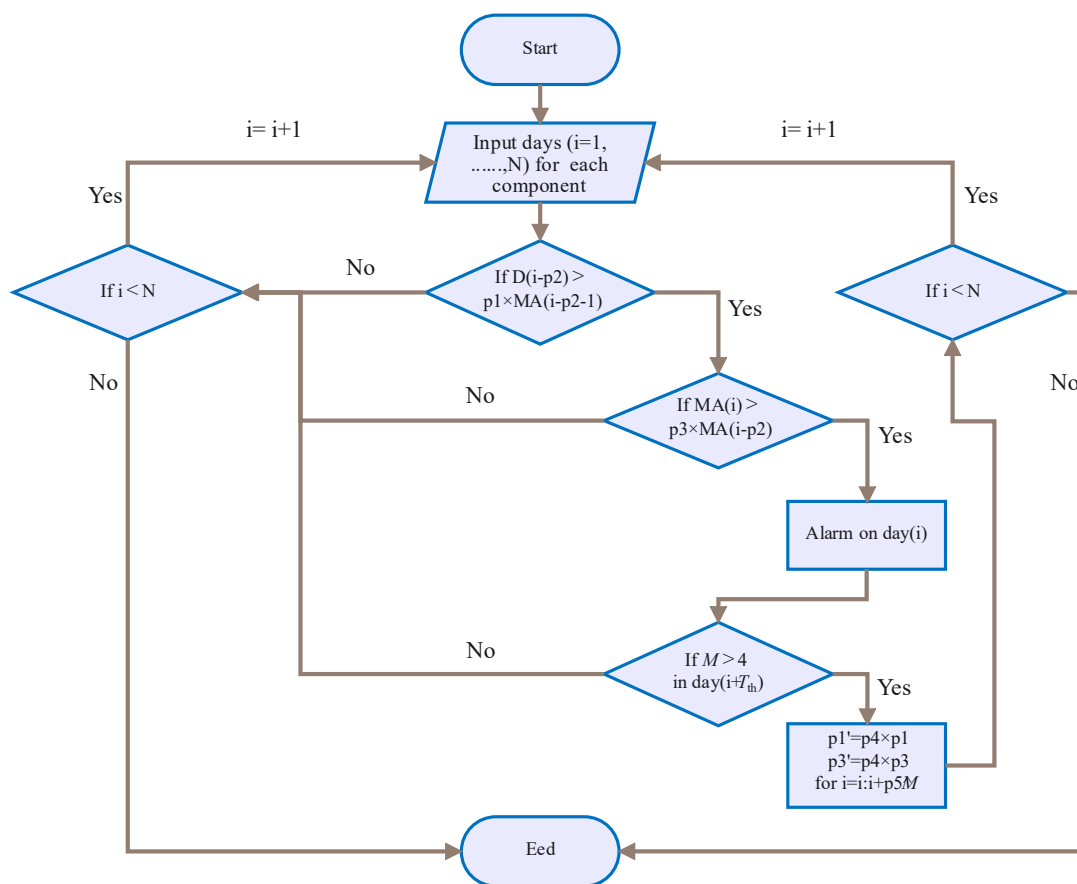

**Figure S2.** Flow chart of anomaly detection algorithm (modified based on Piersanti et al., 2016).  $D$  and  $MA$  are the daily value and the 15-day moving average of each hydrochemical component time series, respectively.

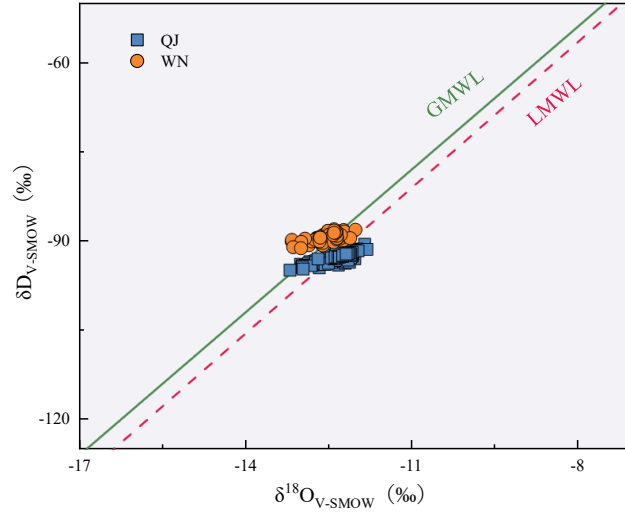

**Figure S3.** Plot of  $\delta D$  versus  $\delta^{18}O$  for thermal springs. GMWL: Global Meteoric Water Line (Craig, 1961); LMWL: Local Meteoric Water Line (Li et al, 2016).

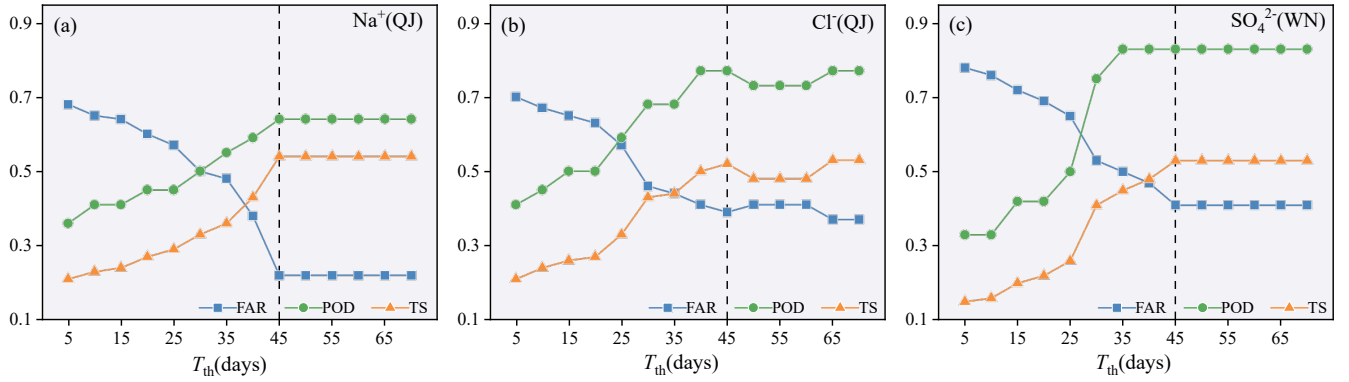

**Figure S4.** Variations in the false alarm rate (FAR), probability of detection (POD), and threat score (TS) as a function of the seismic response time threshold ( $T_{th}$ ).

## Supplementary Information for Table

**Table S1.** Catalog of earthquakes meeting the selection criteria during the thermal spring monitoring period.

| Date       | Lon.   | Lat.  | Depth<br>(km) | $M$ | $\Delta$ (km) |     | Response sites |
|------------|--------|-------|---------------|-----|---------------|-----|----------------|
|            |        |       |               |     | QJ            | WN  |                |
| 2019/06/24 | 101.64 | 24.93 | 10            | 5.2 | 161           | —   | QJ             |
| 2019/08/31 | 101.95 | 23.34 | 13            | 4.3 | 109           | —   | QJ             |
| 2019/11/01 | 102.79 | 24.39 | 13            | 4.0 | 51            | —   | QJ             |
| 2020/01/15 | 103.12 | 25.55 | 8             | 4.8 | 182           | —   | QJ             |
| 2020/01/23 | 101.86 | 23.37 | 15            | 4.0 | 115           | —   | QJ             |
| 2020/04/11 | 101.89 | 23.67 | 12            | 4.1 | 97            | —   | QJ             |
| 2020/06/16 | 102.72 | 22.64 | 9             | 5.2 | 144           | —   | QJ             |
| 2020/07/12 | 102.52 | 22.86 | 11            | 4.8 | 123           | —   | QJ             |
| 2021/05/21 | 99.88  | 25.70 | 10            | 6.7 | 354           | —   | QJ             |
| 2021/06/10 | 101.92 | 24.35 | 8             | 5.6 | 100           | —   | QJ             |
| 2021/06/16 | 101.90 | 24.34 | 8             | 4.8 | 101           | —   | QJ             |
| 2021/06/28 | 101.89 | 24.31 | 8             | 4.9 | 101           | —   | QJ             |
| 2021/11/16 | 101.68 | 22.32 | 10            | 5.2 | 213           | 135 | QJ/WN          |
| 2021/12/24 | 101.68 | 22.34 | 10            | 6.6 | 211           | 133 | QJ/WN          |
| 2022/03/05 | 101.63 | 22.37 | 8             | 4.8 | 191           | 131 | QJ/WN          |
| 2022/07/22 | 99.90  | 21.10 | 10            | 6.2 | 434           | 338 | QJ/WN          |
| 2022/09/05 | 102.09 | 29.59 | 16            | 6.8 | 632           | 676 | QJ/WN          |
| 2022/11/19 | 102.29 | 23.40 | 8             | 5.4 | 79            | 42  | QJ/WN          |
| 2022/11/21 | 102.27 | 23.43 | 14            | 4.1 | —             | 39  | WN             |
| 2023/03/03 | 102.60 | 22.55 | 10            | 4.6 | 156           | 129 | QJ/WN          |
| 2023/03/23 | 100.69 | 22.62 | 10            | 4.7 | —             | 159 | WN             |
| 2023/05/31 | 102.65 | 24.20 | 16            | 4.0 | 33            | 108 | QJ/WN          |
| 2023/08/13 | 101.86 | 24.32 | 10            | 4.8 | 104           | 89  | QJ/WN          |
| 2023/11/17 | 99.35  | 21.20 | 10            | 6.2 | 467           | 368 | QJ/WN          |

“—” means no data.

60 **Table S2.** Parameters of anomaly detection models for each hydrochemical component.

| Parameter       | Na <sup>+</sup> | K <sup>+</sup> | Ca <sup>2+</sup> | Cl <sup>-</sup> | SO <sub>4</sub> <sup>2-</sup> | HCO <sub>3</sub> <sup>-</sup> | F <sup>-</sup> | δD    | δ <sup>18</sup> O | Sites |
|-----------------|-----------------|----------------|------------------|-----------------|-------------------------------|-------------------------------|----------------|-------|-------------------|-------|
| p1              | 1.02            | 1.05           | 1.04             | 1.04            | 1.01                          | 1.01                          | 1.06           | 0.994 | 0.989             | QJ    |
| p3              | 1.01            | 1.01           | 1.04             | 1.02            | 1.02                          | 1.02                          | 1.01           | 0.997 | 0.997             |       |
| p1              | 1.04            | 1.07           | 1.06             | 1.02            | 1.04                          | 1.06                          | 1.02           | 1.001 | 1.001             | WN    |
| p3              | 1.02            | 1.04           | 1.01             | 1.03            | 1.01                          | 1.02                          | 1.01           | 1.002 | 1.002             |       |
| p2              |                 |                |                  |                 | 18                            |                               |                |       |                   | QJ/WN |
| p4              |                 |                |                  |                 | 1.5                           |                               |                |       |                   |       |
| p5              |                 |                |                  |                 | 1.6                           |                               |                |       |                   |       |
| T <sub>th</sub> |                 |                |                  |                 | 45                            |                               |                |       |                   |       |

61

62 **References**

63 Craig, H., 1961. Isotopic Variations in Meteoric Waters. Science, 133(346), 1702-1703.  
64 <https://doi.org/10.1126/science.133.3465.1702>

65 Li, G., Zhang, X., Xu, Y., Song, S., Wang, Y., Ji, X., Xiang, J., & Yang, J., 2016. Characteristics of Stable Isotopes  
66 in Precipitation and Their Moisture Sources in Mengzi Region, Southern Yunnan (in Chinese with English  
67 abstract). Environmental Science, 37(4), 1313-1320. <https://doi.org/10.13227/j.hjkx.2016.04.016>

68 Piersanti, A., Cannelli, V., Galli, G., 2016. The Pollino 2012 seismic sequence: clues from continuous radon  
69 monitoring. Solid Earth, 7(5), 1303-1316. <https://doi.org/10.5194/se-7-1303-2016>
